# Supplementary material
Source: publisher figshare collection journal article supplement (https://frontiersin.figshare.com/ndownloader/files/35129842)
Supplement: Supplementary file [file 35129842]

Appendix A. The research questionnaire

| Constructs             | Items                                                                                                 | Sources                                                                                                                 |
|------------------------|-------------------------------------------------------------------------------------------------------|-------------------------------------------------------------------------------------------------------------------------|
| Technostress           | I feel drained from tasks that require me to use my mobile phone.                                     | Lee et al. (2016);<br>Tarafdar et al. (2007).                                                                           |
|                        | I feel tired from using my mobile phone activities.                                                   |                                                                                                                         |
|                        | Interacting all day with my mobile phone is a strain for me.                                          |                                                                                                                         |
|                        | I feel burned out from using my mobile phone activities.                                              |                                                                                                                         |
|                        | I feel my personal life is being invaded by mobile phone activities.                                  |                                                                                                                         |
| Information Quality    | The mobile learning system provides up-to-date information.                                           | DeLong & McLean (2003, 1992);<br>Stefanovic et al. (2016).                                                              |
|                        | The mobile learning system provides information that is easy to understand                            |                                                                                                                         |
|                        | The mobile learning system provides information that is exactly what you need.                        |                                                                                                                         |
|                        | The mobile learning system provides information that is relevant to your learning.                    |                                                                                                                         |
|                        | The mobile learning system provides sufficient information.                                           |                                                                                                                         |
| System Quality         | The mobile learning system provides high availability.                                                | DeLong & McLean (2003, 1992);<br>Stefanovic et al. (2016).                                                              |
|                        | The mobile learning system provides interactive features between users and system.                    |                                                                                                                         |
|                        | The mobile learning system is well structured.                                                        |                                                                                                                         |
|                        | The mobile learning system is easy to use.                                                            |                                                                                                                         |
|                        | The mobile learning system has attractive features to appeal to the users.                            |                                                                                                                         |
| Satisfaction           | I was very content with the mobile learning system.                                                   | DeLong & McLean (2003, 1992); Seddon (1997); Stefanovic et al. (2016).                                                  |
|                        | I was very pleased with the mobile learning system.                                                   |                                                                                                                         |
|                        | I was satisfied with the efficiency of the mobile learning system.                                    |                                                                                                                         |
|                        | I felt delighted with mobile learning system.                                                         |                                                                                                                         |
|                        | Overall, I was satisfied with the mobile learning system.                                             |                                                                                                                         |
| Performance Expectancy | Using the mobile learning system would improve my learning performance.                               | Arfi et al. (2021); Chao (2019); Duarte, & Pinho (2019); Karimi (2016); Magsamen-Conrad et al. (2015); Venkatesh et al. |
|                        | Using the mobile learning system increased my chances of achieving learning that was important to me. |                                                                                                                         |
|                        | The mobile learning system is useful for my learning.                                                 |                                                                                                                         |

| Constructs              | Items                                                                                                         | Sources                          |
|-------------------------|---------------------------------------------------------------------------------------------------------------|----------------------------------|
|                         | Using the mobile learning system would allow me to accomplish learning tasks more quickly.                    | (2012); Venkatesh et al. (2003). |
|                         | Using the mobile learning system would enhance my effectiveness in learning.                                  |                                  |
| Effort Expectancy       | Learning how to use mobile learning is easy for me.                                                           |                                  |
|                         | My interaction with the mobile learning would be clear and understandable.                                    |                                  |
|                         | I find mobile learning easy to use.                                                                           |                                  |
|                         | I would find it easy to get the mobile learning to do what I want it to do.                                   |                                  |
|                         | It is easy for me to become skillful at using mobile learning.                                                |                                  |
|                         | Overall, I believe that it is easy to use the mobile learning system to support my learning.                  |                                  |
| Social Influence        | People who influence my behavior think that I should use the mobile learning system.                          |                                  |
|                         | People who are important to me think that I should use the mobile learning system.                            |                                  |
|                         | People whose opinions that I value prefer that I use the mobile learning system.                              |                                  |
|                         | My working environment influences my intention to use the mobile learning system.                             |                                  |
|                         | In general, the hospital encourages and supports the use of the mobile learning system in providing learning. |                                  |
|                         | In general, the manager would support the use of the mobile learning system.                                  |                                  |
| Facilitating Conditions | I have the resources necessary to use the mobile learning system.                                             |                                  |
|                         | I have the knowledge necessary to use the mobile learning system.                                             |                                  |
|                         | The mobile learning system is compatible with other forms of learning technologies I use.                     |                                  |
|                         | I can get help from others when I have difficulties using the mobile learning system.                         |                                  |
|                         | I do not need assistance to use the mobile learning system.                                                   |                                  |
| Behavioral              | Assuming I had access to the mobile learning system, I                                                        |                                  |

| Constructs | Items                                                                                 | Sources |
|------------|---------------------------------------------------------------------------------------|---------|
| Intention  | intend to use it.                                                                     |         |
|            | Given that I had access to the mobile learning system, I predict that I would use it. |         |
|            | If the mobile learning system becomes available permanently, I plan to use it.        |         |
|            | I intend to use the mobile learning system whenever possible.                         |         |
|            | I will always try to use the mobile learning system in my academic studies.           |         |
|            | I plan to use the mobile learning system in the future.                               |         |
